# Supplementary material
Source: PubMed Central journal article supplement (PMC3706558)
Supplement: NIHMS450802-supplement-1_si_001.pdf [file NIHMS450802-supplement-1_si_001.pdf]

## SUPPORTING INFORMATION

Structure, Kinetic, and Chemical Mechanism of Isocitrate Dehydrogenase-1 from

*Mycobacterium tuberculosis*

Christine E. Quartararo<sup>‡</sup>, Saugata Hazra<sup>‡</sup>, Timin Hadi<sup>‡</sup>, and John S. Blanchard<sup>‡\*</sup>

TABLE S1: “The Effect of Different Divalent Cations on the Rate of ICDH-1.”

| Metal [5 mM]      | V/E sec <sup>-1</sup> | V/E sec <sup>-1</sup> | V/E sec <sup>-1</sup> |
|-------------------|-----------------------|-----------------------|-----------------------|
|                   | Replicate 1           | Replicate 2           | Average               |
| None              | 0.08                  | 0.09                  | 0.085                 |
| MnCl <sub>2</sub> | 16.18                 | 15.86                 | 16.02                 |
| MgCl <sub>2</sub> | 14.94                 | 13.76                 | 14.35                 |
| CaCl <sub>2</sub> | 0.18                  | 0                     | 0.09                  |
| ZnCl <sub>2</sub> | 0.18                  | 0.25                  | 0.215                 |

Assays were performed with 100 mM HEPES pH 7.0, 600  $\mu$ M isocitrate, 300  $\mu$ M NADP<sup>+</sup>, and 5 mM of the metal tested. Note that the maximum rate is decreased from other experiments since subsequent experiments were performed with ICDH-1 in which 5 mM MnCl<sub>2</sub> had been added to the gel filtration and storage buffers.

SCHEME S1: "Synthesis of [2R-<sup>2</sup>H]isocitrate."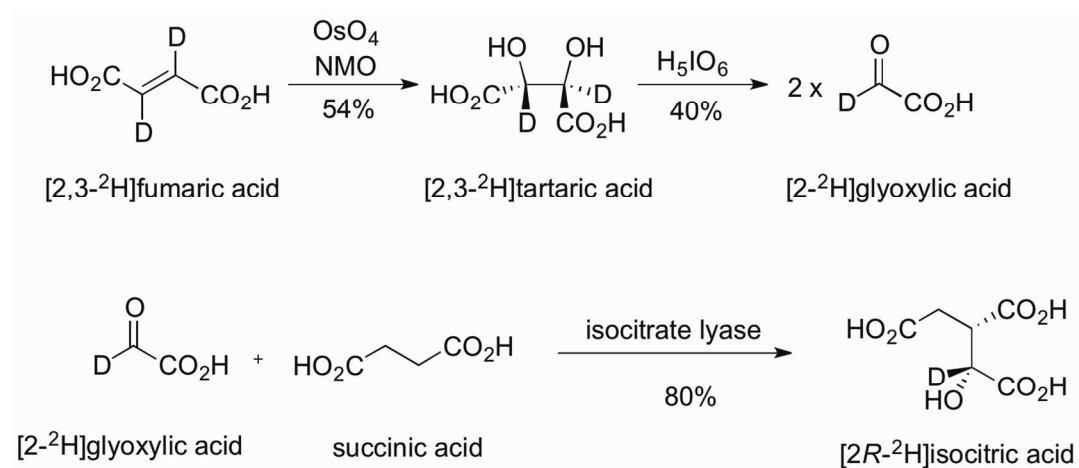

FIGURE S1: “Transfer of  $^2\text{H}$  from  $[2R\text{-}^2\text{H}]$ isocitrate to  $[4R\text{-}4\text{-}^2\text{H}]$ NADPH.” (A)  $^1\text{H}$  NMR of  $[4R\text{-}4\text{-}^2\text{H}]$ NADPH. (B)  $^1\text{H}$  NMR of  $[4R\text{-}4\text{-}^1\text{H}]$ NADPH.

FIGURE S2: “Confirmation of  $\alpha\text{HG}$  by Mass Spectrometry.” Mass spectrum of secondary reaction product,  $\alpha\text{HG}$ ,  $m/z = 147.0301$  in negative mode. The peak to the left  $m/z = 147.0187$  is  $\alpha\text{KG}$  in negative mode  $A + 2$ . Data were collected on a 12 Tesla Fourier transform ion cyclotron resonance mass spectrometer (Agilent).

FIGURE S3: “Preliminary Kinetics of Secondary Reaction.” (A) The rate of the secondary ICDH-1 reaction was measured with saturating NADPH (100  $\mu\text{M}$ ) and varying  $\alpha\text{KG}$  (1-50 mM). Fitting to eq 1  $k_{\text{cat}} = 0.12 \pm 0.02 \text{ sec}^{-1}$ ,  $K_{\alpha\text{KG}} = 8.3 \pm 1.2 \text{ mM}$ . (B) The rate of the secondary ICDH-1 reaction was measured with constant  $\alpha\text{KG}$  (40 mM) and varying NADPH (1-50  $\mu\text{M}$ ). Fitting to eq 1  $k_{\text{cat}} = 0.10 \pm 0.02 \text{ sec}^{-1}$ ,  $K_{\text{NADPH}} = 0.9 \pm 0.8 \mu\text{M}$ . (C) A replicate of panel (B). Fitting to eq 1  $k_{\text{cat}} = 0.17 \pm 0.02 \text{ sec}^{-1}$ ,  $K_{\text{NADPH}} = 2.3 \pm 1.0 \mu\text{M}$ .

FIGURE S4: “Sequence Alignment of Relevant ICDHs.” ClustalO sequence alignment using EMBL-EBI server of the top three BLAST hits in the PDB against Mtb ICDH-1, plus *E. coli*. UniProt identifiers are on the right. Orange highlights are Lys 215 and Tyr 142 in the proposed chemical mechanism. Yellow highlighted residues are NADPH contacts, purple are  $\text{Mn}^{2+}$  contacts, blue are residues referenced in the discussion of regulation, and green is the analogous Hc R132 mutation location.

FIGURE S5: “Contacts between NADPH and Mtb ICDH-1.” A LigPlot<sup>(1)</sup> generated figure where red spheres represent oxygen, blue spheres represent nitrogen, black spheres represent carbon. The gold lines are the backbone of Mtb ICDH-1, and the purple lines are the backbone of NADPH. The red spokes are hydrophobic interactions, and the green numbers are distances in angstroms.

Figure S1

A

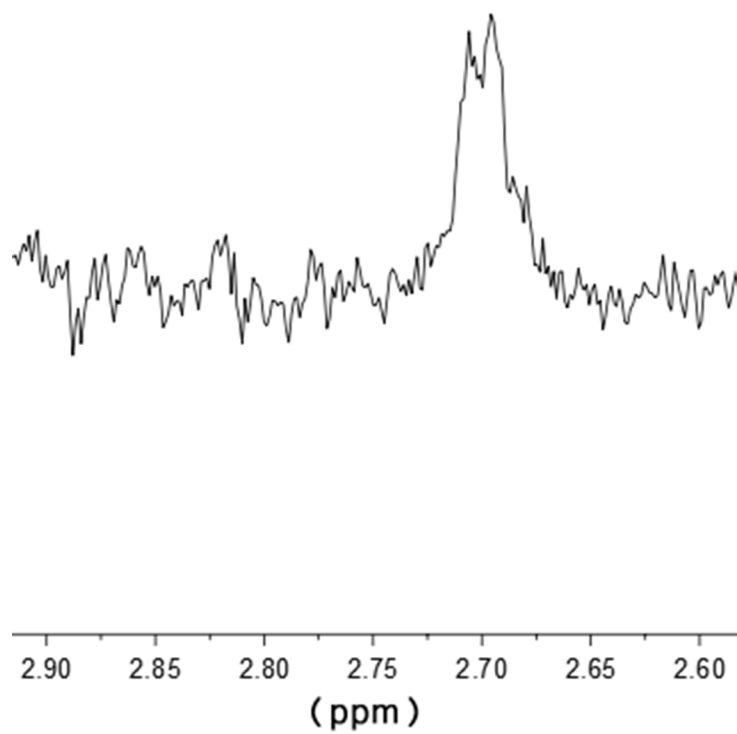

B

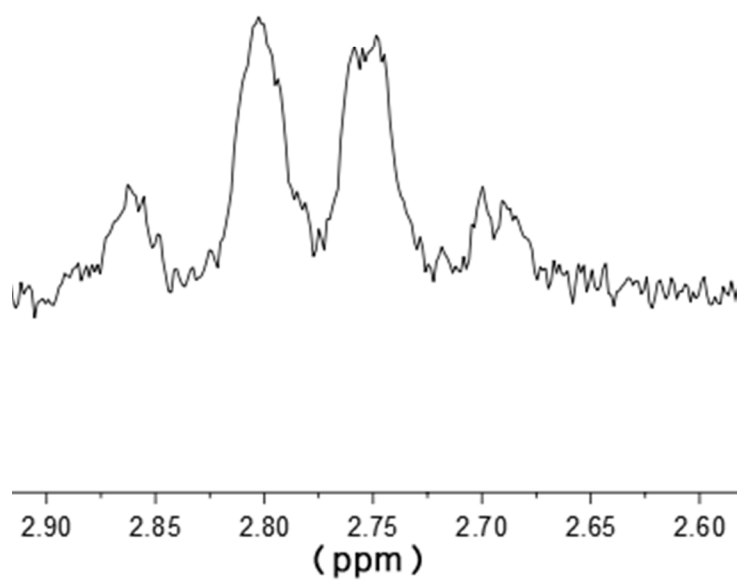

Figure S2

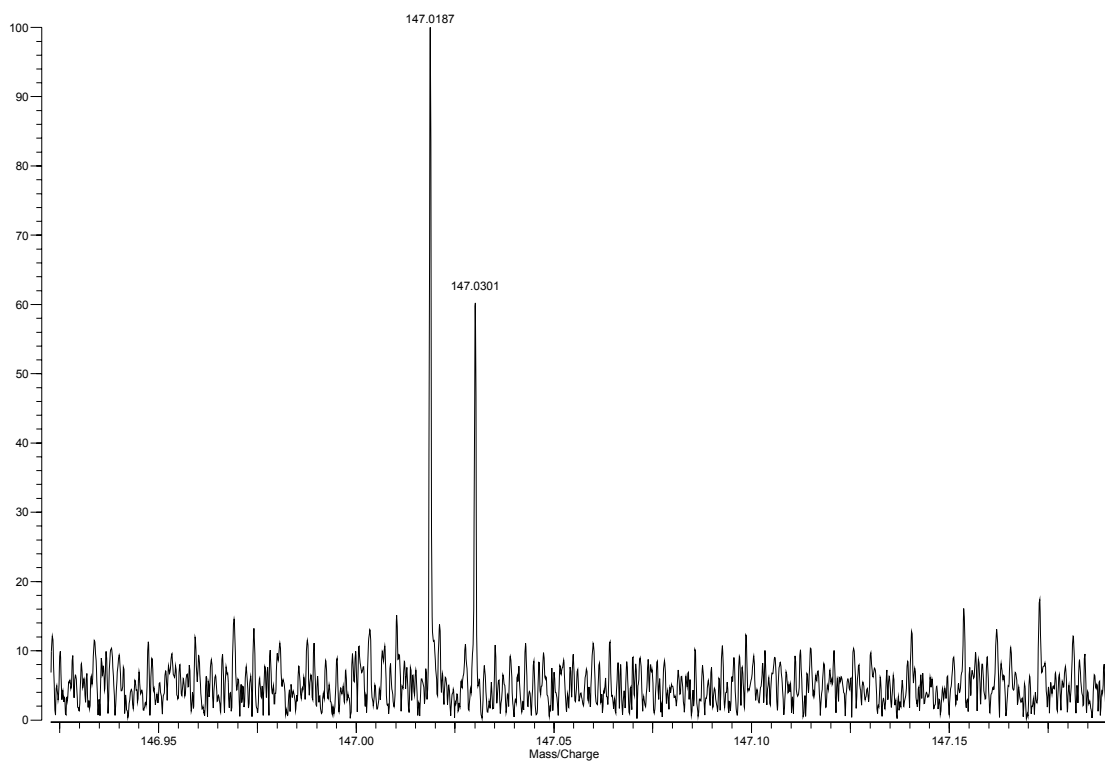

Figure S3

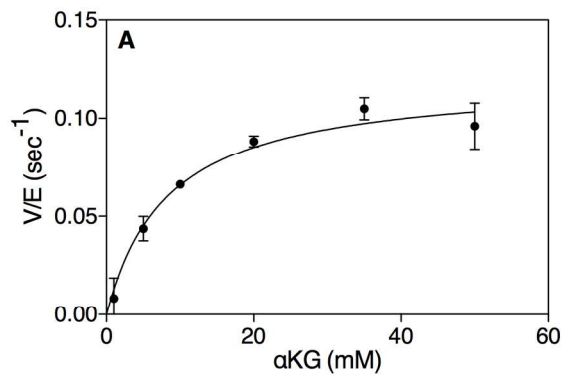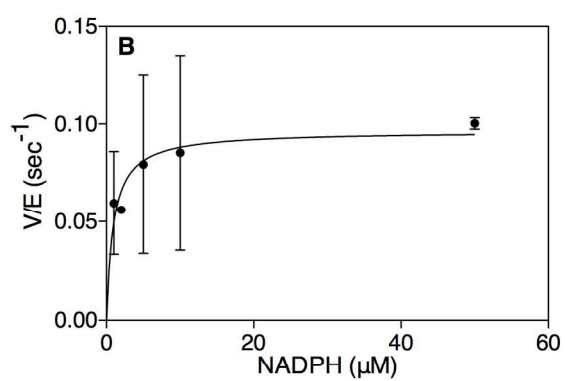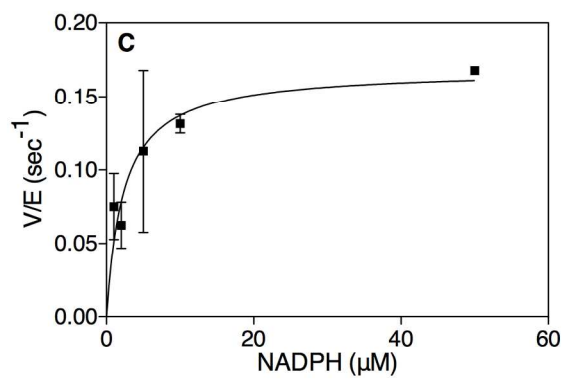

Figure S4

|        |                        |                                                                |     |
|--------|------------------------|----------------------------------------------------------------|-----|
| P65097 | <i>M. tuberculosis</i> | -----MSNAPKIKVSGPVVELDGDDEMTRVIWK-LIKDMLILPYLDIRLDYYDL-----    | 47  |
| Q92PG6 | <i>R. meliloti</i>     | -----MAKIKVANPVVELDGDDEMTRIIWQ-FIKDKLIHPYLDLDLEYDYL-----       | 44  |
| 075874 | <i>H. sapiens</i>      | -----MSKKISGGSVVEMOGDDEMTRIIWE-LIKEKLIFFYVELDLHSYDL-----       | 44  |
| P33198 | <i>S. scrofa</i>       | ARAAARHYADQRIVKAPVEMDGDDEMTRIIWQ-FIKEKLIIPHVDVQLKYFDL-----     | 53  |
| P08200 | <i>E. coli</i>         | -----MESKVVVPAQGKKITLQNGKLNVPENPIIPYIEGDGIGVDVTPAMLK           | 47  |
|        |                        | . ** :*::* : : : * *::: * :                                    |     |
|        |                        |                                                                |     |
| P65097 | <i>M. tuberculosis</i> | ----GIEHRDATD-----DQVTIDAAYAIAKKHGIVGVKCATITPD                 | 82  |
| Q92PG6 | <i>R. meliloti</i>     | ----GVENRDATD-----DQVTIDAANAIAKKHGIVGVKCATITPD                 | 79  |
| 075874 | <i>H. sapiens</i>      | ----GIENRDATN-----DQVTKDAAEAIAKKHNVGVKCATITPD                  | 79  |
| P33198 | <i>S. scrofa</i>       | ----GLPNRDQTN-----DQVTIDSALATQKYSVAVKCATITPD                   | 88  |
| P08200 | <i>E. coli</i>         | VVDAAVEKAYKGERKISWMEIYTGEKSTQVYGDVWLPALDLDLIREYRVAIKGPLTTPV    | 107 |
|        |                        | . : . : : : : : : : : : : : * : * * * * * * :                  |     |
|        |                        |                                                                |     |
| P65097 | <i>M. tuberculosis</i> | EARVEEFNLKKMWLSPNGTIRNILGGTIFREPIVISNVPRVLPVGTWKPI-----VIG     | 134 |
| Q92PG6 | <i>R. meliloti</i>     | EGRVEEFKLKMWKSPNGTIRNILGGVIFREPIICKNVPRVLPVGTWKPI-----IVG      | 131 |
| 075874 | <i>H. sapiens</i>      | EKRVEEFKQKMWKSPNGTIRNILGGTVFREAIICKNIPRLVSGWVKPI-----IIG       | 131 |
| P33198 | <i>S. scrofa</i>       | EARVEEFKLKMWKSPNGTIRNILGGTIFREPIICKNIPRLVLPVGTWKPI-----TIG     | 140 |
| P08200 | <i>E. coli</i>         | GGGIRSLNV-----ALRQE-----LDLYICLRPVRYQGTSPVVKHPELTDMMVIF        | 152 |
|        |                        | : : : : : : : : : : : : . * * * . * : : :                      |     |
|        |                        |                                                                |     |
| P65097 | <i>M. tuberculosis</i> | RHAFGDQYRATNFKVDQPGTVT-LTFTPADGSAPIVHEMVSIPEDGGVVLGMYNFKESIR   | 193 |
| Q92PG6 | <i>R. meliloti</i>     | RHAFGDQYRATDFKFPKGGKLS-IKFVGEDGQT-IEHDVYD-APGAGVALAMYNLDESIT   | 188 |
| 075874 | <i>H. sapiens</i>      | RHAYGDQYRATDFVVPVPGPKVE-ITYTPSDGTQKVTYLVHNFEEGGVAMGMYNQDKSIE   | 190 |
| P33198 | <i>S. scrofa</i>       | RHAHGDQYKATDFVVDVDRAGTFK-IVFTPKDGSSAKQWEVYNFPA-GVGMGMINTDESIS  | 198 |
| P08200 | <i>E. coli</i>         | RENSEDIYAGIEWKADSADAEKVIKFLREE----MGVKKIRFPHEHCIGIKPCS-EEGTK   | 207 |
|        |                        | *. * * . : : : : : : : : : * : : . . . .                       |     |
|        |                        |                                                                |     |
| P65097 | <i>M. tuberculosis</i> | DFARASFSYGLNA-KWPVYLSTKNTILKAYDGMFKDEFERVYEEEFKAQFEAAGLTYEHR   | 252 |
| Q92PG6 | <i>R. meliloti</i>     | EFARASFNGLQR-KVPVYLSTKNTILKAYDGRFKDIFQKVFDEEFAAQFKAEKLWYEHR    | 247 |
| 075874 | <i>H. sapiens</i>      | DFAHSSSQMALS-KWPLYLSTKNTILKAYDGRFKDIFQEIYDKQYKYSQFEAQKIWEHR    | 249 |
| P33198 | <i>S. scrofa</i>       | GFAHSCFYAIQK-KWPLYLSTKNTILKAYDGRFKDIFQEIPEKHVKDFDKYKIWEHR      | 257 |
| P08200 | <i>E. coli</i>         | RLVRAAIEYAIANDRDSVTLVHKNGNIMKFTTEGAFKDWGYQLAREEFGGLIDGGPWLVKVK | 267 |
|        |                        | : : : : : : : : : : * * : * * * * * : : : : : : : :            |     |
|        |                        |                                                                |     |
| P65097 | <i>M. tuberculosis</i> | L-----IDDMV-----AAC-LKWSGGYVWACKNYDGDVQSDTVAQGYGSLGLMSTSVL     | 298 |
| Q92PG6 | <i>R. meliloti</i>     | L-----IDDMV-----ASA-LKWSGGYVWACKNYDGDVQSDIVAQGYGSLGLMSTSVL     | 293 |
| 075874 | <i>H. sapiens</i>      | L-----IDDMV-----AQA-MKSEGGFIWACKNYDGDVQSDSVAQGYGSLGMSTSVL      | 295 |
| P33198 | <i>S. scrofa</i>       | L-----IDDMV-----AQV-LKSSGGFVWACKNYDGDVQSDILAQGYGSLGLMSTSVL     | 303 |
| P08200 | <i>E. coli</i>         | NPNTGKEIVIKDVIADAFLLQQLLRPAEYDVIACMNLNGDYISDALAAQVGGIGIAPGAN   | 327 |
|        |                        | *. * : : : : : * * * : * * * * : * * : : * : : . .             |     |
|        |                        |                                                                |     |
| P65097 | <i>M. tuberculosis</i> | MTADGKTVEAEAAGTIVTRHYRQYQAGKPTST----NPIASIFAWTRGLQHRGKLDGTPE   | 354 |
| Q92PG6 | <i>R. meliloti</i>     | MTPDGKTVEAEAAGTIVTRHYRQHQKGEETST----NSIASIFAWTRGLAHRKLDGNAE    | 349 |
| 075874 | <i>H. sapiens</i>      | VCPDGKTVEAEAAGTIVTRHYRMYQKQGETST----NPIASIFAWTRGLAHRKLDNNKE    | 351 |
| P33198 | <i>S. scrofa</i>       | VCPDGKTIEAEAAGTIVTRHYREHQKGRPTST----NPIASIFAWTRGLEHRKLDGNQD    | 359 |
| P08200 | <i>E. coli</i>         | IGDECAL--FEATHGTAPKY-AGQDKVNPGSIIILSAEMMLRHMGWTEAADLIVK-----   | 378 |
|        |                        | : : : * * * * : : : . * : : : * * * . *                        |     |
|        |                        |                                                                |     |
| P65097 | <i>M. tuberculosis</i> | VIDFAHKLESVVIATVESGKMTKDLAILIG-----PEQDWLNSEEFLDIAIDNLEKELA    | 408 |
| Q92PG6 | <i>R. meliloti</i>     | LAKFSETLERVCVDTVESGFMTKDLALLIG-----PDQPWLSTTGFLDKIDENLRKAMA    | 403 |
| 075874 | <i>H. sapiens</i>      | LAFFANALEEVSIIETIEAGFMTKDLAICKGLPNVQRS-DYLNTFEMDKLGENLKIKLA    | 410 |
| P33198 | <i>S. scrofa</i>       | LIRFAQTLEKVCVETVESGAMTKDLAGCIGHLSNVKLNEHFLNTSDFLDTIKSNLDRALG   | 419 |
| P08200 | <i>E. coli</i>         | -----GMEGAINAKTVTYDFERLMD-----GAKLLKCESEFGDAIENM-----          | 416 |
|        |                        | : : : : * * : : : * . * * : * :                                |     |
|        |                        |                                                                |     |
| P65097 | <i>M. tuberculosis</i> | N---                                                           | 409 |
| Q92PG6 | <i>R. meliloti</i>     | A---                                                           | 404 |
| 075874 | <i>H. sapiens</i>      | QAKL                                                           | 414 |
| P33198 | <i>S. scrofa</i>       | RQ--                                                           | 421 |
| P08200 | <i>E. coli</i>         | ----                                                           | 416 |



Figure S5

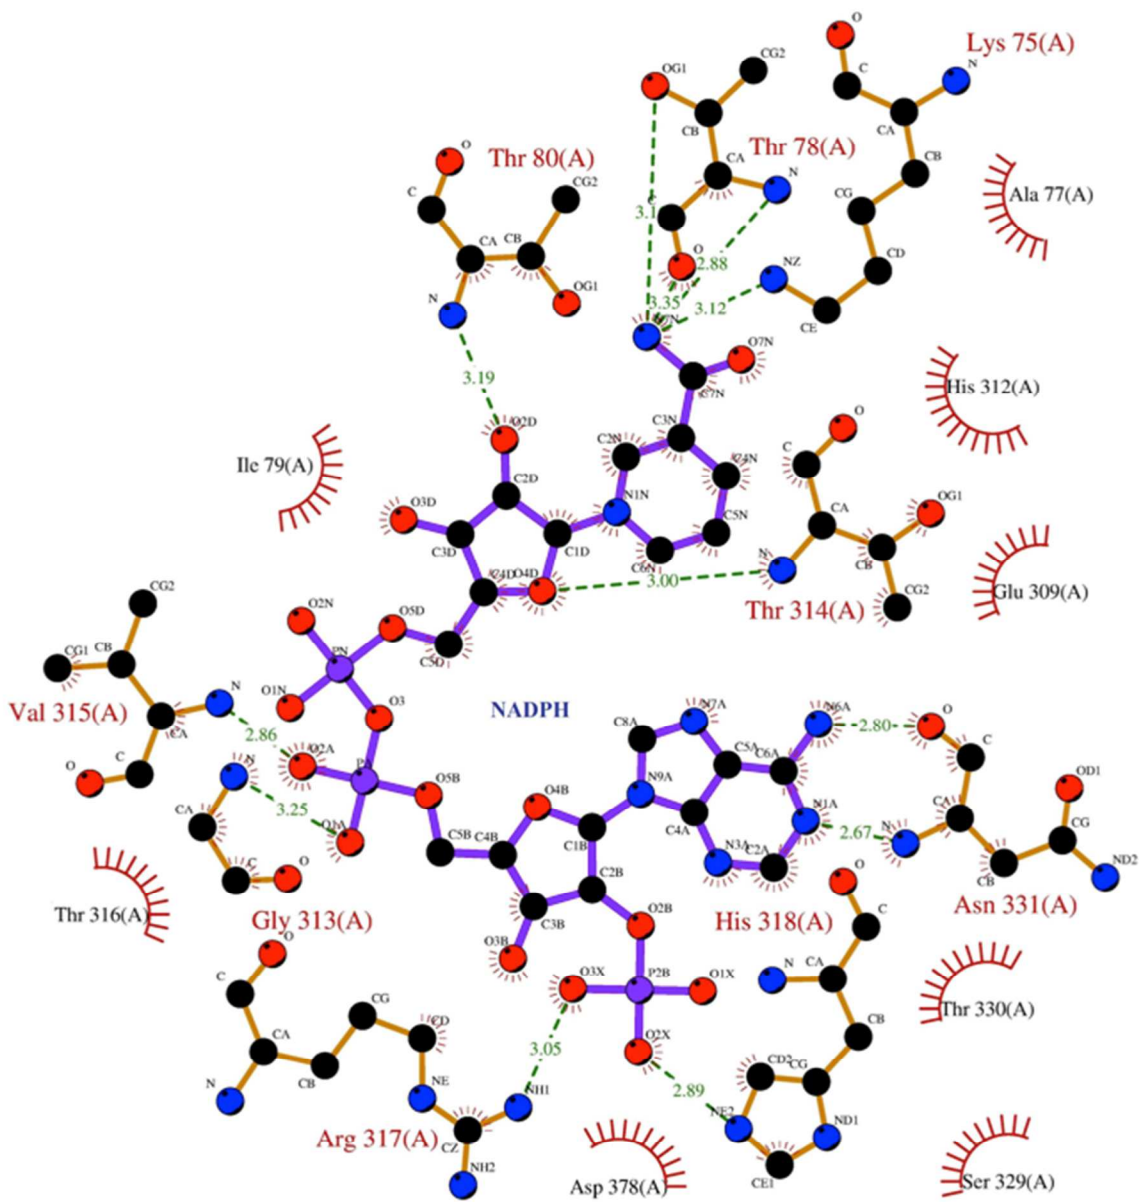

1. Wallace, A. C., Laskowski, R. A., and Thornton, J. M. (1995) LIGPLOT: a program to generate schematic diagrams of protein-ligand interactions, *Protein engineering* 8, 127-134.
